# Supplementary material for: Effects of CaCl2 Treatment Alleviates Chilling Injury of Loquat Fruit (Eribotrya japonica) by Modulating ROS Homeostasis
Source: MDPI journal article supplement (doi:10.3390/foods10071662), 2021-07-19
Supplement: s1 [file s1]

**Table S1.** Primer sequences for Real-time PCR analysis

| Gene           | Forward Primer (5' to 3') | Reverse Primer (5' to 3')  |
|----------------|---------------------------|----------------------------|
| <i>EjSOD</i>   | ACTGTGATGCTTTCGTCCCC      | CGGCGAAAGACATGGATTGG       |
| <i>EjCAT</i>   | GCTCCCAGTTAATGCTCCCA      | GCACTTGTCACGCTTTCAG        |
| <i>EjAPX</i>   | CGCCGAAACGAAAACAGGAG      | TTGGCTTTCACCTCCTCGCA       |
| <i>EjGR</i>    | GTCGAAGTCATAGTGGGCCT      | GCCTTTGCCCTCTGTACGAT       |
| <i>EjDHAR</i>  | CCTCCCAATGCCGTCGTAT       | AACCATTCTGGCTTGTTGCC       |
| <i>EjMDHAR</i> | ATAGGGCGATTGGTGCTTCC      | TTACGGATCGGTTGTCGTGG       |
| <i>EjACT</i>   | AATGGAACTGGAATGGTCAAGGC   | TGCCAGATCTTCTCCATGTCATCCCA |
